# Supplementary material for: Research of the influence of anions in complexes [CuPhen(Hpz)2X2] (X = CF3COO−, Otf−, Cl−) on the structure and bioactivity
Source: Royal Society of Chemistry journal article supplement (doi:10.1039/d3nj04903e), 2023-12-01
Supplement: d3nj04903e1.pdf [file d3nj04903e1.pdf]

## Supplementary data

### Research of the influence of anions in complexes [CuPhen(Hpz)<sub>2</sub>X<sub>2</sub>] (X= CF<sub>3</sub>COO<sup>-</sup>, Otf, Cl) on the structure and bioactivity

Marina A. Uvarova<sup>a\*</sup>, Irina A. Lutsenko<sup>a</sup>, Maxim A. Shmelev<sup>a</sup>, Sergey E. Nefedov<sup>a</sup>, Olga B. Bekker<sup>b</sup>, Arseniy I. Lashkin<sup>c</sup>, Victoria O. Shender<sup>c</sup>, Igor L. Eremenko<sup>a</sup>

**Table S1.** Crystal data and structure refinement parameters for 1-3

|                                                                                                                   | <b>1</b>                                                                           | <b>2</b>                                                                                       | <b>3</b>                                                         |
|-------------------------------------------------------------------------------------------------------------------|------------------------------------------------------------------------------------|------------------------------------------------------------------------------------------------|------------------------------------------------------------------|
| Empirical formula                                                                                                 | C <sub>22</sub> H <sub>16</sub> N <sub>6</sub> O <sub>4</sub> F <sub>6</sub><br>Cu | C <sub>20</sub> H <sub>16</sub> N <sub>6</sub> O <sub>6</sub> F <sub>6</sub> S <sub>2</sub> Cu | C <sub>18</sub> H <sub>16</sub> Cl <sub>2</sub> CuN <sub>6</sub> |
| CCDC                                                                                                              | 2289146                                                                            | 2289147                                                                                        | 2289148                                                          |
| Formula weight (g mol <sup>-1</sup> )                                                                             | 605.95                                                                             | 678.05                                                                                         | 450.81                                                           |
| Crystal system                                                                                                    | triclinic                                                                          | monoclinic                                                                                     | monoclinic                                                       |
| Space group                                                                                                       | <i>P</i> -1                                                                        | <i>C</i> 2/ <i>c</i>                                                                           | <i>P</i> 2 <sub>1</sub> / <i>c</i>                               |
| <i>a</i> (Å)                                                                                                      | 10.1267(17)                                                                        | 16.084(3)                                                                                      | 13.2386(1)                                                       |
| <i>b</i> (Å)                                                                                                      | 10.9088(18)                                                                        | 11.6918(17)                                                                                    | 8.9177(13)                                                       |
| <i>c</i> (Å)                                                                                                      | 12.076(2)                                                                          | 16.023(3)                                                                                      | 15.758(2)                                                        |
| α,                                                                                                                | 78.050(3)                                                                          |                                                                                                |                                                                  |
| β,                                                                                                                | 72.589(3)                                                                          | 119.823(3)                                                                                     | 95.674(8)                                                        |
| γ,                                                                                                                | 76.521(3)                                                                          |                                                                                                |                                                                  |
| <i>V</i> , Å <sup>3</sup>                                                                                         | 1224.2(4)                                                                          | 2614.0(7)                                                                                      | 1851.3(4)                                                        |
| <i>Z</i>                                                                                                          | 2                                                                                  | 4                                                                                              | 4                                                                |
| <i>D</i> <sub>calc</sub> (g cm <sup>3</sup> )                                                                     | 1.644                                                                              | 1.723                                                                                          | 1.617                                                            |
| μ(Mo-Kα) (mm <sup>-1</sup> )                                                                                      | 0.980                                                                              | 1.087                                                                                          | 1.485                                                            |
| <i>F</i> (000)                                                                                                    | 610                                                                                | 1364                                                                                           | 916                                                              |
| 2θ <sub>max</sub> , deg.                                                                                          | 60                                                                                 | 60                                                                                             | 61                                                               |
| Reflections collected                                                                                             | 8632                                                                               | 11068                                                                                          | 11821                                                            |
| Independent reflections                                                                                           | 6507                                                                               | 3786                                                                                           | 5471                                                             |
| <i>R</i> <sub>int</sub>                                                                                           | 0.0300                                                                             | 0.0514                                                                                         | 0.0512                                                           |
| Parameters                                                                                                        | 364                                                                                | 186                                                                                            | 244                                                              |
| <i>Goof</i>                                                                                                       | 1.014                                                                              | 1.016                                                                                          | 1.030                                                            |
| <i>R</i> <sub><i>I</i></sub> <sup>[a]</sup> , w <i>R</i> <sub>2</sub> <sup>[b]</sup> ( <i>I</i> > 2σ( <i>I</i> )) | 0.0629,<br>0.1473                                                                  | 0.0356, 0.0894                                                                                 | 0.0493, 0.0856                                                   |
| <i>R</i> <sub><i>I</i></sub> <sup>[a]</sup> , w <i>R</i> <sub>2</sub> <sup>[b]</sup> (all data)                   | 0.1140,<br>0.1708                                                                  | 0.0499, 0.0972                                                                                 | 0.0979, 0.0982                                                   |
| Δρ <sub>max</sub> , ρ <sub>min</sub> (e/Å <sup>3</sup> )                                                          | 0.77/-0.66                                                                         | 0.84/-0.38                                                                                     | 0.59/-0.88                                                       |

<sup>[a]</sup>  $R_I = \sum ||F_o| - |F_c|| / \sum |F_o|$ . <sup>[b]</sup>  $wR_2 = [\sum w(F_o^2 - F_c^2)^2 / \sum w(F_o^2)^2]^{1/2}$ .  $Goof = [\sum w(F_o^2 - F_c^2) / (n-p)]^{1/2}$

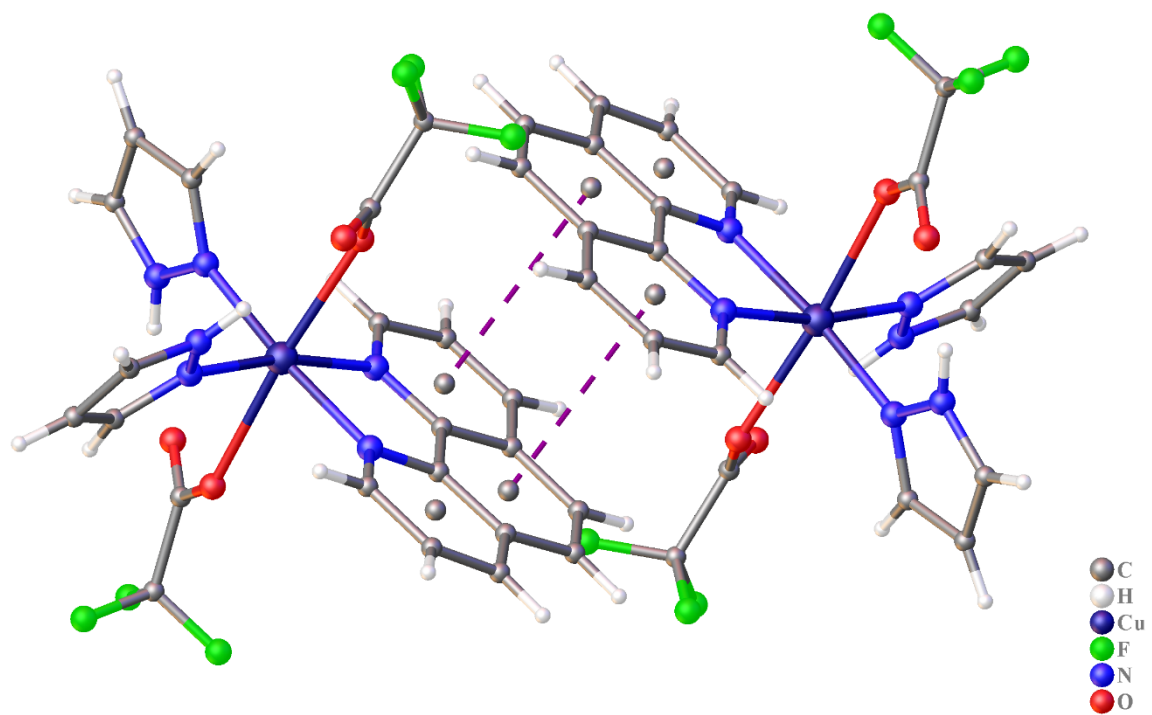

Fig. S1.  $\pi \dots \pi$  interactions in crystal packing of complex 1.
